# Supplementary material for: A dual signal amplification nanosensor based on SERS technology for detection of tumor-related DNA
Source: Royal Society of Chemistry journal article supplement (doi:10.1039/c8cc07461e), 2018-12-04
Supplement: c8cc07461e1.pdf [file c8cc07461e1.pdf]

## **A Dual Signal Amplification Nanosensor Based on SERS Technology for Detection of Tumor-Related DNA**

Duo Lin,<sup>a</sup> Tianxun Gong,<sup>b</sup> Sufang Qiu,<sup>c</sup> Qiong Wu,<sup>d</sup> Ching-Yu Tseng,<sup>e</sup> Kien Voon Kong,<sup>e\*</sup>  
Guannan Chen,<sup>d\*</sup> and Rong Chen<sup>d\*</sup>

<sup>a</sup> College of Integrated Traditional Chinese and Western Medicine, Fujian University of Traditional Chinese Medicine, Fuzhou, 350122, China

<sup>b</sup> *State Key Laboratory of Electronic Thin Films and Integrated Devices, University of Electronic Science and Technology of China, Chengdu, 610054, China*

<sup>c</sup> *Fujian Medical University Cancer Hospital & Fujian Cancer Hospital radiation oncology department; Fujian Provincial Key Laboratory of Translational Cancer Medicine, Fuzhou, 350014, China*

<sup>d</sup> *Key Laboratory of OptoElectronic Science and Technology for Medicine, Ministry of Education, Fujian Provincial Key Laboratory for Photonics Technology, Fujian Normal University, Fuzhou, 350007, China. E-mail: [edado@fjnu.edu.cn](mailto:edado@fjnu.edu.cn); [chenr@fjnu.edu.cn](mailto:chenr@fjnu.edu.cn)*

<sup>e</sup> *Department of Chemistry, National Taiwan University, Taipei, 10617, Taiwan. E-mail: [kvkong@ntu.edu.tw](mailto:kvkong@ntu.edu.tw)*

## 1. Material and methods

**SERS measurement.** A microscopic Raman instrument (Renishaw) with a 633 nm laser, a 50× objective lens and a Peltier cooled CCD was used for Raman spectral measurement. Before each measurement, the instrument was calibrated using a silicon wafer with a Raman peak at 520  $\text{cm}^{-1}$ . After that, each spectrum was obtained with 10 s inquisition time and then undergo process of baseline correction using a polynomial multipoint fitting function and curve fitting function provided by WiRE 4.3 software. The final intensities of Raman peaks were used for spectral analysis, such as quantitative analysis.

**Preparation of  $\text{Os-S-CO}$ .** 0.191 g (0.20 mmol) of (p-benzenethiolato)-decarbonyl-hydrido-triosmium and 250 mL of cyclohexane were mixed into 500 mL round bottom neck flask. The solution is purged with carbon monoxide for 15 min. The solution is then irradiated for 2.5 hour by using an external high-pressure mercury lamp. After removal of solvent in vacuum, the yellow residue is chromatographed on silica thin layer chromatography (TLC) plates using hexane- $\text{CH}_2\text{Cl}_2$  (85: 15) as eluent. The product, is at  $R_f = 0.17$ . The IR CO absorptions (hexane): 2109 (very weak), 2075 (strong), 2028 (strong), 2012 (weak).

**Preparation of  $\text{Re-S-CO}$ .**  $\text{Re}_2(\text{CO})_8(\text{MeCN})_2$  (120 mg, 0.177 mmol) and 2 equivalents (0.354 mmol) of benzene-1,4-dithiol were dissolved in 20 ml of toluene. Subsequently the reaction mixture was heated to 80  $^\circ\text{C}$ . All the starting material reacts within 30 min as shown by the disappearance of the characteristic IR absorption of  $\text{Re}_2(\text{CO})_8(\text{MeCN})_2$  at 2069  $\text{cm}^{-1}$ . The solution was cooled to room temperature and after solvent removal the crude material was purified by TLC using the following solvent mixtures:  $\text{CH}_2\text{Cl}_2$ -hexane (1: 7). The IR CO absorptions (hexane): 2106 (weak), 2094 (medium), 2025 (very strong), 1969 (medium).

**Fabrication of nanopillar substrate and <sup>Os</sup>-SCO embedded substrate.** Four inches p-type single side polished <100> wafers were used. Etching is conducted in an Advanced Silicon Etcher. Nanopillars were formed using a ion etching method. After step, the nanopillars were exposed to argon plasma for 1 min to completely remove the etchant gas residuals and the decomposition products. A chromium adhesion layer is evaporated onto the Si nanopillar structure. Finally, gold was deposited on the heads of the nanopillars by electron beam evaporation.

For SERS measurement of <sup>Os</sup>-SCO and <sup>Re</sup>-SCO, the substrate was repeatedly cleaned with absolute ethanol. The substrate was incubated into prepared 1 mL of ethanolic solution of <sup>Os</sup>-SCO and <sup>Re</sup>-SCO (100 μM) for 1 hour. After that, the substrate was rinsed with ethanol (1 mL x 3) sequentially before Raman measurement. For <sup>Os</sup>-SCO embedded substrate, substrate was incubated with <sup>Os</sup>-SCO (100 μM) for 24 hours. Finally, the substrates were coated with Au (99.999% purity, JEOL) at various thicknesses by sputtering technique (JEOL, JFC-1600 Auto fine coater). Each metal layer was deposited at a rate of 1.33nm/s.

**Electromagnetic Simulation.** To simulate the plasmonic properties of the gold nanopillars, we used an RF extended module under COMSOL Multiphysics. The desired size and 3D shape were drawn in draw mode using the Cartesian coordinate system. The boundary conditions and perfectly matched layer were also defined in draw mode. Simulation duration for a single nanoparticle took about 4 hours.

**Preparation of DNR-SiO<sub>2</sub>@Au-<sup>Re</sup>-SCO.** SiO<sub>2</sub>@Au was purchased from Nanoseedz (Hong Kong). 10 mL of SiO<sub>2</sub>@Au (25 OD) was centrifuged and its pellet was collected. Pellet was then dispersed in 5 mL of DMSO, and 50 μL of APTES was then added. The mixture was allowed to react for 20 hours, and then was collected by centrifugation and washed with ethanol twice, and amine-functionalized SiO<sub>2</sub>@Au pellet was collected. Pellet was dispersed in THF (10 mL), succinic anhydride (42 mg, 0.417 mmol) was added as a 1 mM solution in DMSO. The reaction was allowed to stir

at room temperature. After 20 h, the carboxyl-functionalized  $\text{SiO}_2@\text{Au}$  was recovered by centrifugation at 5000 rpm for 10 min. The conjugation of daunorubicin with carboxyl was followed by reported procedure. Daunorubicin conjugated to carboxyl-functionalized  $\text{SiO}_2@\text{Au}$ , we used EDC/NHS coupling that can bind covalently with COOH-  $\text{SiO}_2@\text{Au}$  and amine groups of DNR. A 0.1 M EDC/NHS solution (1-ethyl-3-(3-dimethylaminopropyl)- carbodiimide/N-hydroxysulfosuccinimide ( Sulfo-NHS), and 80  $\mu\text{L}$  of 10 mM daunorubicin were mixed with 10 mL of the carboxyl-functionalized  $\text{SiO}_2@\text{Au}$  solution for 24 hr. Finally, the DNR- $\text{SiO}_2@\text{Au}$  were washed with DI water twice, and pellet was collected. For loading  $^{\text{Re-S}}\text{CO}$ , pellet (600  $\mu\text{L}$ ) was dispersed in 400  $\mu\text{L}$  ethanoic solution of  $^{\text{Re-S}}\text{CO}$  (1 M) for 24 h. Pellet was collected by centrifugation at 2000 rpm and washed with water (2 mL) three times. After that DNR- $\text{SiO}_2@\text{Au}-^{\text{Re-S}}\text{CO}$  was dispersed in buffer and keep in 4°C. Please note that the ratio of water to ethanol is important. the high ratio of ethanol will reduce the loading of  $^{\text{Re-S}}\text{CO}$  to silica.

The  $^{\text{Re-S}}\text{CO}$  loading content and entrapment efficiency were calculated by the following equations: Loading content = (concentration of  $^{\text{Re-S}}\text{CO}$  – remaining  $^{\text{Re-S}}\text{CO}$  in solution)/concentration of  $\text{SiO}_2@\text{Au}$ . The heating process from  $\text{SiO}_2@\text{Au}$  was monitored with IR camera (FLIR, A325sc). In the release experiment, 1.0 mL of  $\text{SiO}_2@\text{Au}-^{\text{Re-S}}\text{CO}$  solution was agitated and irradiated with 808 nm laser light (2  $\text{W}/\text{cm}^2$ ). The mixture was centrifuged at one hour intervals. The supernatant was collected and the same volume of fresh buffers was added back to the residual mixture. The amount of released  $^{\text{Re-S}}\text{CO}$  in the surfactant was determined by Raman measurement at 2113  $\text{cm}^{-1}$  on nanopillar substrate.

**Preparation of DNR- $^{\text{Re-S}}\text{CO}$  Nanotag.** 10  $\mu\text{M}$  (1  $\mu\text{L}$ ) of freshly prepared solutions of  $^{\text{Re-S}}\text{CO}$  in ethanol were mixed with 60-nm gold colloids ( $2.6 \times 10^{10}$  particles/mL, BBInternational UK) in ethanol. After a 2-day incubation period, the excess metal carbonyl was removed by centrifugation (10,000 rpm, 2 min). We quantified the number of metal carbonyls bound on the nanoparticles by using ICP-MS

to measure the concentration of rhenium elements from unreacted metal carbonyls left behind in the process (supernatant). The unreacted amount was used to substrate the original amount of metal carbonyls. The amount was divided by the number of gold nanoparticles, in which we determined based on the peak optical density and BBInternational UK product data sheet. The number of metal carbonyls per gold nanoparticles was  $\sim 216 \pm 42$ . For the conjugation of NRD to nanotag, DNR was first incubated with thiol-PEG (2K)-NHS for overnight in 1.5 to 1 ratio via the interaction between amine and NHS functional group. The excess of DNR will be removed via dialysis in water for 12 hours. The nanotag was then incubated with  $10 \mu\text{M}$  ( $1 \mu\text{L}$ ) of thiol-PEG (2K)-DNR for 2 hours. The excess thiol-PEG (2K)-DNR was removed by centrifugation ( $10,000 \text{ rpm}$ ,  $2 \text{ min}$ ).

**DNA detection.**  $\text{Os-SCO}$  embedded nanopillar substrate was first functionalized with thiol functionalized streptavidin (Nanocs).  $1 \text{ mg}$  of thiol functionalized streptavidin dissolved in  $2 \text{ mL}$  of water in a  $2.5 \text{ mL}$  eppendorf tube. Substrate ( $0.3 \times 0.3 \text{ cm}$ ) was incubated in the solution for 24 hour. Substrate was then washed with water ( $5 \text{ mL}$ ) for three times and dried under nitrogen gas flow. Standard target DNA sequence which was prepared from amine reactive biotin (NHS-Biotin) and terminal  $\text{NH}_2$  in the DNA sequence. For DNA test, we prepared  $5 \text{ mL}$  of hybridization mixture ( $2\times$  standard saline citrate,  $50\%$  deionized formamide,  $10\%$  dextran sulfate,  $10\%$  Denhardt's solution,  $0.5\%$  Tween 20,  $0.25 \text{ mg/mL}$  salmon sperm DNA) containing the biotinylated EBV DNA specific from Bam HI (W) V region of EBV genome (Enzo Diagnostic, Inc.). The mixture as denatured simultaneously on a  $95 \text{ }^\circ\text{C}$  heating for 12 minutes and cooling rapidly. After hybridization at  $37 \text{ }^\circ\text{C}$ , the substrate was incubated with substrate for 1 hour. The substrate was then washed with saline sodium citrate buffer for three times and incubated with DNR- $\text{SiO}_2@Au\text{-Re-SCO}$  solution ( $20 \text{ OD}$  of nanorod) for 30 minute at room temperature. After washing with SSC, the substrate was dried under nitrogen flow. SERS measurement was done before NIR ( $808 \text{ nm}$ ;  $2 \text{ W/m}^2$ ) irradiation applied as for monitoring the release process. NIR was applied to the

substrate (the light spot fully cover the substrate, 0.3 cm) for 1 hour. Specificity study was performed with 100 ng/mL of non-complementary and base mismatch.

BamHI (W) V is tandemly repeated (7 to 12 times) in the viral genome and widely used for hybridization detection of EBV. The sequence (5'-3') is

BiotinATCCCCACCGGCCCTTCTCTGTCCCCCTGCTCCTCTCCAACCTTCG  
CTCCACCCTAGACCCAG

Complementary sequence:

TAGGGGTGGCCGGGAAGAGAGACAGGGGGACGAGGAGAGGTTGGAAGC  
GAGGTGGGATCTGGGGTC

Single base mismatch sequence:

TAG**T**GGTGGCCGGGAAGAGAGACAGGGGGACGAGGAGAGGTTGGAAGC  
GAGGTGGGATCTGGGGTC

Double base mismatch sequence:

TAGGGGTGGCC**TGTA**AAGAGAGACAGGGGGACGAGGAGAGGTTGGAAGCG  
AGGTGGGATCTGGGGTC

Quadruple base mismatch sequence:

TAGGGGTG**ACCGGGAAGAGAGACAGGGTGACGAGGAGAGGG**TGGAAGC  
GAGGTGGG**G**TCTGGGGTC

## 2. Supporting figures

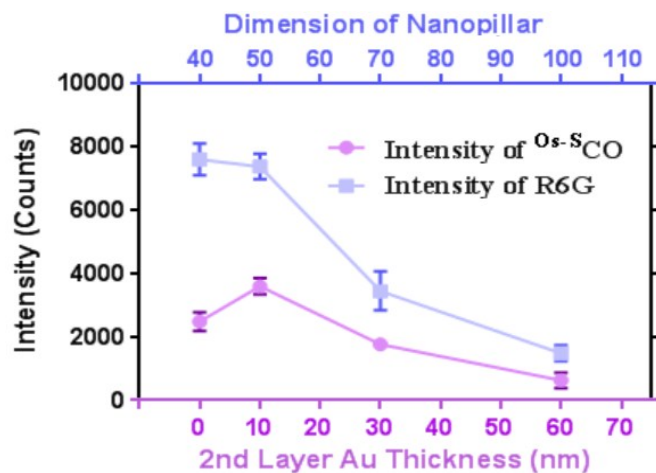

**Figure S1.** Calculated near-field electromagnetic field distribution of the Au-Os-SiCO-Au nanopillar with different 2nd Au layer thickness.

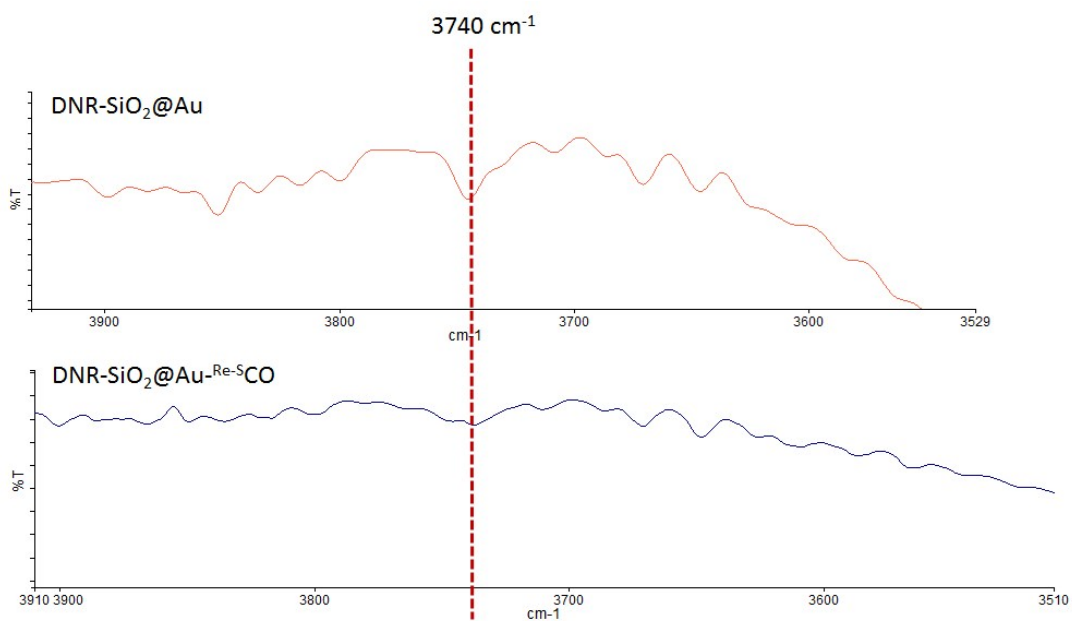

**Figure S2.** A broad absorption between 3800-3300  $\text{cm}^{-1}$  is observed. The 3740  $\text{cm}^{-1}$  is due to the stretching mode of free silanols and a broad absorption at lower wavenumbers, extending to 3300  $\text{cm}^{-1}$  which is due to hydrogen bonding between silanols.

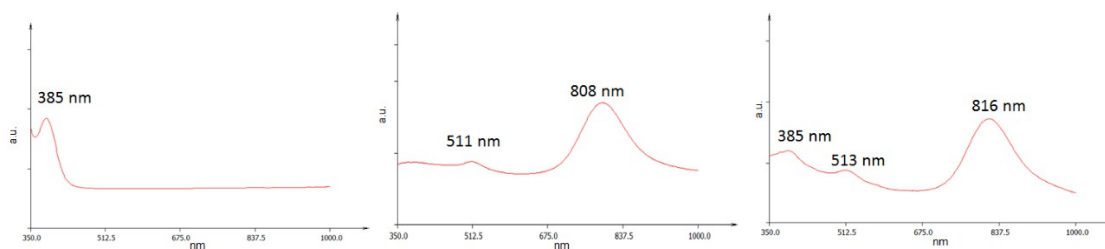

**Figure S3.** Two typical Au plasmon resonances of SiO<sub>2</sub>@Au in the transverse band (520 nm) and the longitudinal band (~800 nm) and absorption of Re-S<sub>2</sub>CO.

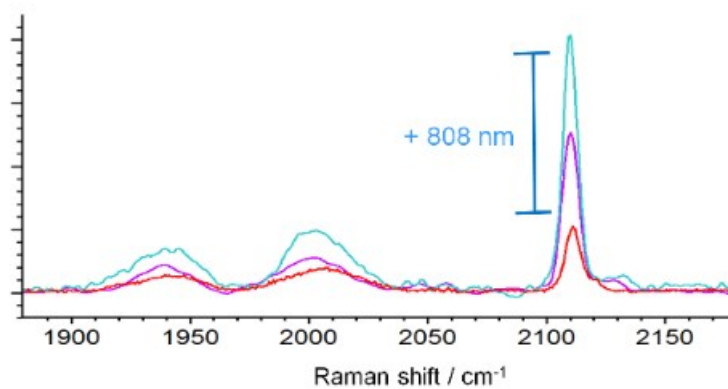

**Figure S4.** Spectra of Re-S<sub>2</sub>CO release induced by irradiation with an 808 nm laser.



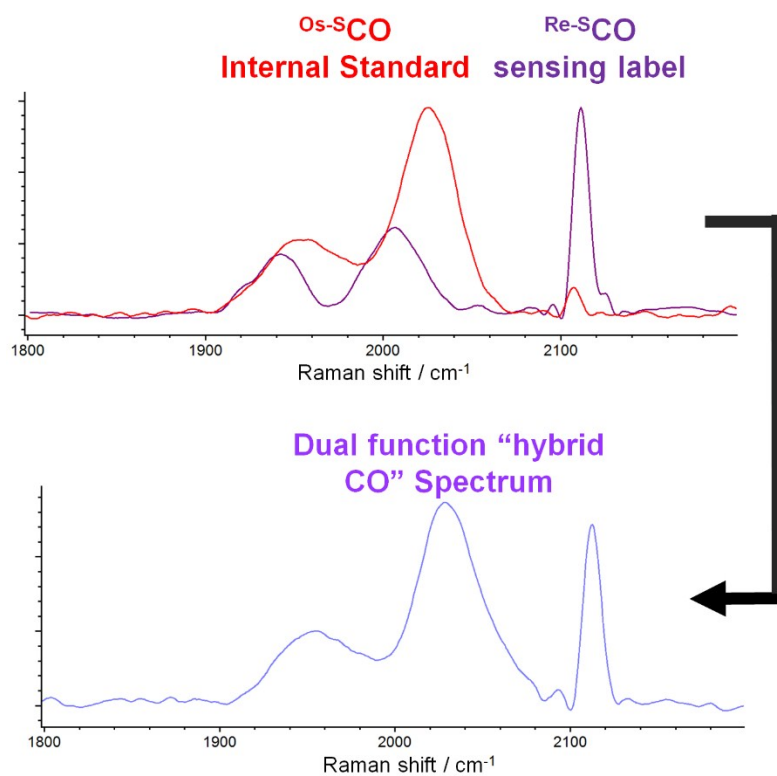

**Figure S5.** Overlapping SERS spectra of Os-SCO and Re-SCO used to produce a dual functional “hybrid CO” spectrum.

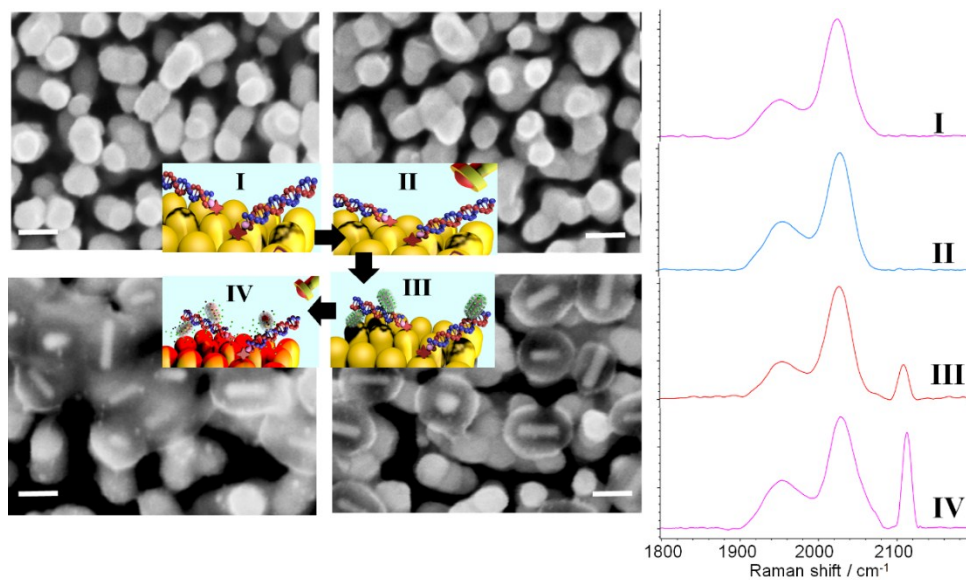

**Figure S6.** Mechanism detection and the generation of hybrid spectrum.

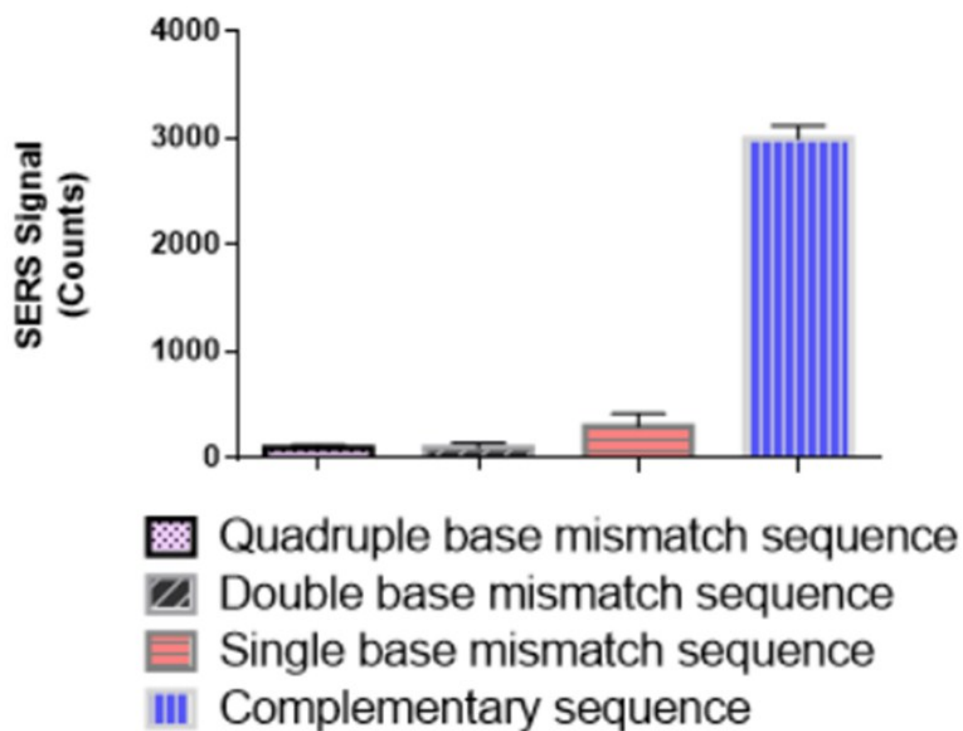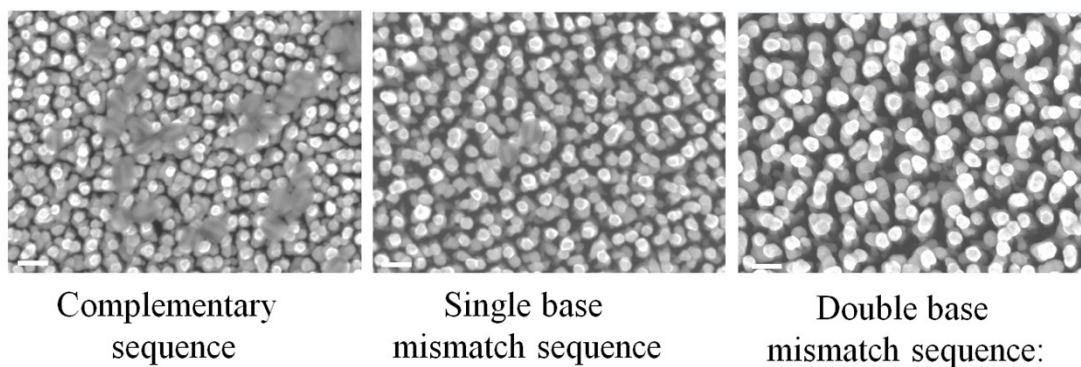

Figure S7. SERS response showing the selectivity of the nanosensor with 1 pM concentration of DNA and SEM images of specific study with different mismatch sequence and complementary sequence.

| Concentration of | Intensity | SUMMARY OUTPUT               |                       |                       |               |                |                       |                  |                    |                    |
|------------------|-----------|------------------------------|-----------------------|-----------------------|---------------|----------------|-----------------------|------------------|--------------------|--------------------|
| 1000             | 3000      |                              |                       |                       |               |                |                       |                  |                    |                    |
| 1000             | 3100      |                              |                       |                       |               |                |                       |                  |                    |                    |
| 1000             | 3312      | <i>Regression Statistics</i> |                       |                       |               |                |                       |                  |                    |                    |
| 1000             | 2980      | Multiple R                   | 0.99104676            |                       |               |                |                       |                  |                    |                    |
| 1000             | 2987      | R Square                     | 0.98217369            |                       |               |                |                       |                  |                    |                    |
| 800              | 2500      | Adjusted R Square            | 0.98139863            |                       |               |                |                       |                  |                    |                    |
| 800              | 2312      | Standard Error               | 136.256862            |                       |               |                |                       |                  |                    |                    |
| 800              | 2411      | Observations                 | 25                    |                       |               |                |                       |                  |                    |                    |
| 800              | 2245      |                              |                       |                       |               |                |                       |                  |                    |                    |
| 800              | 2233      | <i>ANOVA</i>                 |                       |                       |               |                |                       |                  |                    |                    |
| 500              | 1500      |                              | <i>df</i>             | <i>SS</i>             | <i>MS</i>     | <i>F</i>       | <i>Significance F</i> |                  |                    |                    |
| 500              | 1432      | Regression                   | 1                     | 23527265.39           | 23527265      | 1267.228       | 1.28E-21              |                  |                    |                    |
| 500              | 1344      | Residual                     | 23                    | 427016.4456           | 18565.93      |                |                       |                  |                    |                    |
| 500              | 1654      | Total                        | 24                    | 23954281.84           |               |                |                       |                  |                    |                    |
| 500              | 1622      |                              |                       |                       |               |                |                       |                  |                    |                    |
| 200              | 800       |                              | <i>Coefficients</i>   | <i>Standard Error</i> | <i>t Stat</i> | <i>P-value</i> | <i>Lower 95%</i>      | <i>Upper 95%</i> | <i>Lower 95.0%</i> | <i>Upper 95.0%</i> |
| 200              | 760       | Intercept                    | 161.070748            | 49.49947357           | 3.253989      | 0.003496       | 58.67329              | 263.4682         | 58.67329           | 263.4682           |
| 200              | 654       | X Variable 1                 | 2.82886395            | 0.079466616           | 35.59814      | 1.28E-21       | 2.664475              | 2.993253         | 2.664475           | 2.993253           |
| 200              | 986       |                              |                       |                       |               |                |                       |                  |                    |                    |
| 200              | 811       |                              | <b>LOD</b>            | <b>57.74</b>          |               |                |                       |                  |                    |                    |
| 100              | 400       |                              | LOD = (3.3*49.49)/2.8 |                       |               |                |                       |                  |                    |                    |
| 100              | 342       |                              |                       |                       |               |                |                       |                  |                    |                    |
| 100              | 321       |                              |                       |                       |               |                |                       |                  |                    |                    |
| 100              | 564       |                              |                       |                       |               |                |                       |                  |                    |                    |
| 100              | 532       |                              |                       |                       |               |                |                       |                  |                    |                    |

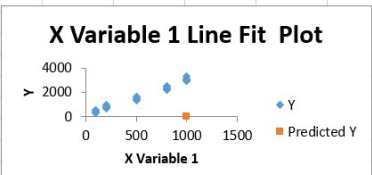

Figure 8. Determination of limit of detection.

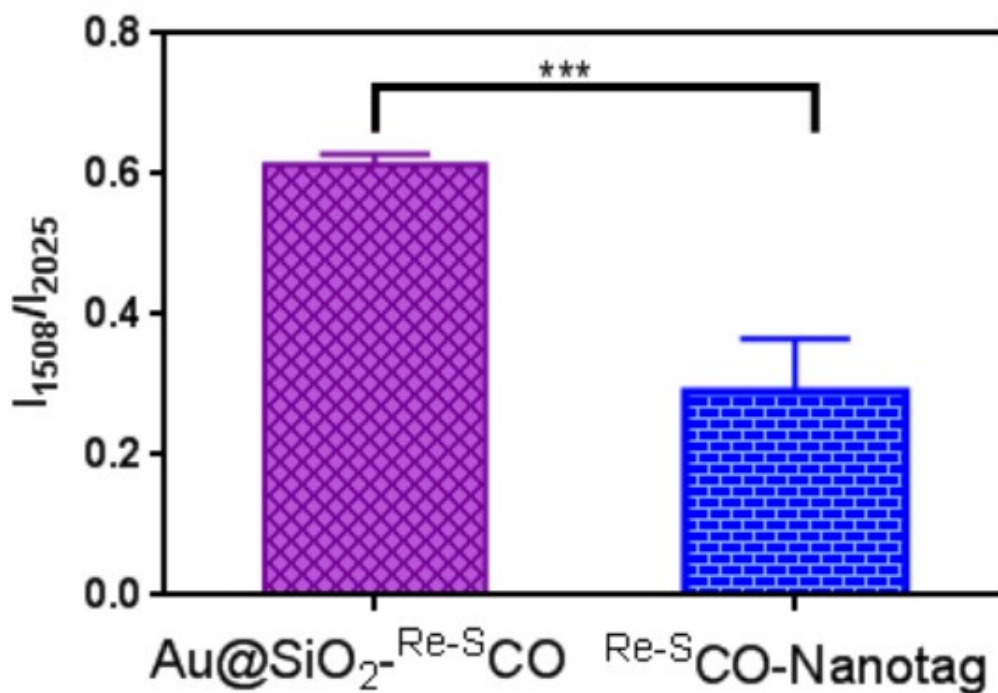

**Figure S9.** Comparison of DNR-Au@SiO<sup>-Re</sup>-<sup>S</sup>CO with the SERS nanotag (DNR-<sup>Re</sup>-<sup>S</sup>CO nanotag) method.

**Table S1.** Recovery study of SERS assay.

|            | Spiked Concentration<br>(nM) | Detected Concentration<br>(nM) | Recovery<br>(%) |
|------------|------------------------------|--------------------------------|-----------------|
| PBS Buffer | 1.5                          | 1.35 ± 0.12                    | 90              |
| Plasma     | 1.5                          | 1.31 ± 0.30                    | 87              |
